# Supplementary material for: Phase I/II study of tirabrutinib, a second-generation Bruton’s tyrosine kinase inhibitor, in relapsed/refractory primary central nervous system lymphoma
Source: PubMed Central journal article supplement — Neuro Oncol. 2020 Jun 25;23(1):122–33. doi: 10.1093/neuonc/noaa145 (PMC7850159; doi:10.1093/neuonc/noaa145), 2020-06-25
Supplement: noaa145_suppl_supplementary_text.pdf [file noaa145_suppl_supplementary_text.pdf]

## Supplementary Text

### Transition rules

The cohort transition rules shown in the **Supplementary Table 1** were applied when three patients enrolled in the same cohort completed evaluation for the 28-day period after initial tirabrutinib administration (cycle 1).

### Prohibited therapies

Prohibited therapies were chemotherapy within 21 days, or administration of nitrosourea within 42 days, radiation therapy within 14 days, invasive surgery within 28 days prior to the first tirabrutinib dose, as well as any unapproved drugs, such as adrenocortical hormone, anticoagulant use, cytochrome CYP3A4 inducer, P-gp inducer, or potent CYP3A4 inhibitor, and hematopoietic factor products. Prophylactic administration of the following drugs was permitted in this study: antibacterial agent such as ciprofloxacin or other fluoroquinolone agent, amoxicillin, or trimethoprim-sulfamethoxazole; acyclovir; antihistamine, and adrenocortical hormone (at lower doses than the prohibited dose).

### Main exclusion criteria

The main exclusion criteria were presence of intraocular primary central nervous system lymphoma (PCNSL) without a cerebral lesion; inability to undergo contrast-enhanced magnetic resonance imaging; PCNSL without a B-cell neoplasm; systemic lymphomatous lesions; presence of severe neurological symptoms; recent round of chemotherapy or radiotherapy; use of nitrosourea, antibody drug, or any other unapproved drug prior to the first tirabrutinib dose; medical history of other malignant tumours; presence of severe disease complications that may affect protocol compliance, presence of comorbidities, such as severe cardiac or lung disease; infectious diseases (including HIV and cytomegalovirus); history of severe allergies; pregnant or nursing women; inability to swallow tablets; prior treatment with any Bruton's tyrosine kinase inhibitor; inability to provide consent; or considered ineligible by the investigator.

### Kits used for genetic testing

The kits used were kept at room temp, except for QIAamp MinElute<sup>®</sup> Columns that are kept refrigerated.

The QIAamp<sup>®</sup> DNA Formalin-Fixed Paraffin-Embedded Tissue Kit (50) (Cat. No. 56404, Lot No. 157042227, 160042934; Qiagen K.K., Tokyo, Japan) was used. For library preparation, polymerase chain reaction (PCR) was run on the GeneAmp<sup>®</sup> PCR System 9700 using the following programme: 99° C for 2 min for 1 cycle; 99°C for 15 sec followed by 60°C for 4 mins for 23 cycles; and hold the reaction at 10°C. PCR was performed at maximum ramp speed and the reaction volume was 20 µL. The nucleotide sequence primer pool used is shown in **Supplementary Table 3**. The software used for library quantification was 2100 Expert Software (Version B.02.08.S1648, Agilent Technologies, Inc., Tokyo, Japan). Software used for analysis of mutations was Variant Caller (Version 5.0.4.0, Thermo Fisher Scientific Inc., Hudson, NH, USA). For the analysis of coverage of each Amplicon, coverageAnalysis (Version 5.0.4.0, ThermoFisher Scientific Inc., Hudson, NH, USA) was used. For other calculations, Microsoft Excel 2016 (Microsoft Corp.) was used.

### Pharmacokinetics

In phase 1, blood samples were obtained immediately before tirabrutinib administration and 30 min and 1, 2, 3, 4, 6, 8, and 12 hours after tirabrutinib administration on day 1 and day 28 of cycle 1; and immediately before tirabrutinib administration on days 2, 8, and 15. In phase 2, blood samples were obtained immediately before tirabrutinib

administration and 2 hours after tirabrutinib administration on day 1 and day 28 of cycle 1; and immediately before tirabrutinib administration on days 8 and 15. To measure the trough concentration of tirabrutinib in cerebrospinal fluid (CSF), samples of CSF were obtained on day 1 of cycle 1 (2–4 hours after tirabrutinib administration), immediately before tirabrutinib administration on days 2 and 28, and 2–4 hours after administration on day 28.

### **Rational for sample size**

For phase 1, the number of subjects required to examine the increase in the next cohort was set according to the Guidelines for Clinical Evaluation Methods of Anti-Cancer Drugs; thus, three or six patients were planned per cohort. The threshold response rate of this study was set at 14·0% for patients with relapsed/refractory PCNSL, and it was assumed that an overall response rate (ORR) of 50·9% or higher would be obtained as an ORR of 75·0% (95% confidence interval [exact method]: 50·9–91·3) was obtained in overseas phase 1/2 ibrutinib studies.<sup>1–4</sup>

### **Study analysis sets**

The safety analysis set (SAF) included all the patients who received the study drug at least once. The full analysis set included all patients in the SAF in whom efficacy could be analysed. The dose-limiting toxicity (DLT) population was defined as the population of patients in phase 1 who presented a DLT in cycle 1, had a study drug compliance  $\geq 80\%$ , and had not discontinued treatment in cycle 1. The pharmacokinetics analysis set was defined as patients who had at least one plasma or CSF tirabrutinib concentration measurement.

### **Data sharing**

Request for deidentified patient data should be made by qualified researchers to Ono Pharmaceutical Co., Ltd. via the following website: Clinical Study Data Request.com (<https://clinicalstudydatarequest.com/>). Approval for any data request will be considered in accordance with Ono Pharmaceutical Co., Ltd. Policy for the Disclosure of Clinical Study Data as outlined in the following website: <https://www.ono.co.jp/eng/rd/policy.html>.

### **References**

- [1] Grommes C, Pastore A, Palaskas N, et al. Ibrutinib Unmasks Critical Role of Bruton Tyrosine Kinase in Primary CNS Lymphoma. *Cancer Discov* 2017; **7**: 1018–29.
- [2] Lionakis MS, Dunleavy K, Roschewski M, et al. Inhibition of B Cell Receptor Signaling by Ibrutinib in Primary CNS Lymphoma. *Cancer Cell* 2017; **31**: 833–43.
- [3] Soussain C, Choquet S, Blonski M, et al. Ibrutinib monotherapy for relapse or refractory primary CNS lymphoma and primary vitreoretinal lymphoma: Final analysis of the phase II 'proof-of-concept' iLOC study by the Lymphoma study association (LYSA) and the French oculo-cerebral lymphoma (LOC) network. *Eur J Cancer* 2019; **117**: 121–30.
- [4] Chamoun K, Choquet S, Boyle E, et al. Ibrutinib monotherapy in relapsed/refractory CNS lymphoma: A retrospective case series. *Neurology* 2017; **88**: 101–2.

**Supplementary Table 1. Cohort transition rules**

| <b>Number of patients with DLT at each dose</b>   | <b>Dose escalation rule</b>                                                                                                                              |
|---------------------------------------------------|----------------------------------------------------------------------------------------------------------------------------------------------------------|
| 0 of 3 patients, or 1 of 6 patients               | Cohort 1: Administer to the next 3 patients in cohort 2. Cohort 2: Completion of phase 1 (deemed tolerable at doses up to 480 mg).                       |
| 1 of 3 patients                                   | Add 3 patients at the same dose.                                                                                                                         |
| $\geq 2$ of 3 patients, or $\geq 2$ of 6 patients | Cohort 1: Stop dose escalation and regard the same dose as the maximum dose*. Cohort 2: Completion of phase 1 (regard the same dose as the maximum dose) |

\*Maximum dose administered

DLT, dose-limiting toxicity

**Supplementary Table 2. Tirabrutinib dose reduction steps**

| <b>Dose</b> | <b>Dose reduction step 1</b> | <b>Dose reduction step 2</b> |
|-------------|------------------------------|------------------------------|
| 320 mg QD   | 160 mg QD                    | --                           |
| 480 mg QD   | 320 mg QD                    | 160 mg QD                    |

QD, once daily

**Supplementary Table 3. Sequencing primer pool**

| Amplicon ID    | Ion AmpliSeq, forward         | Ion AmpliSeq, reverse          | Gene                   | Chr | Amplicon Start | Amplicon Stop |
|----------------|-------------------------------|--------------------------------|------------------------|-----|----------------|---------------|
| AMPL7153023015 | GTGGCCTCATGAGGATCATCAC        | TGAGTTCCTCAGAAGGCAGAAGA        | <i>CARD11</i> exon 23  | 7   | 2951742        | 2951914       |
| AMPL7153023032 | AGCAGAATATGATTGAAAAATCGGTAGGT | GCAGGGCCTGACTGATTGATAAA        | <i>CARD11</i> exon 20  | 7   | 2956878        | 2957052       |
| AMPL7153023055 | GGGTACCTTCCAGAGAGAACT         | TCCCTCTGCAGATGACAGTCA          | <i>CARD11</i> exon 15  | 7   | 2963861        | 2964010       |
| AMPL7153036771 | GGGATGGCTGTTGTTAACCTT         | GGGAACCTTTCTTCATTGCCTTG        | <i>MYD88</i> codon 256 | 3   | 38182530       | 38182680      |
| AMPL7153055306 | CCAACCACACCAGCAGATAGTG        | GGGACACTAACACTCTGATCTCCA       | <i>CD79B</i> exon 5    | 17  | 62006723       | 62006876      |
| AMPL7153109082 | TTTCTGGAAAAGTACTTCTGGCAT      | TCACTCACTTCATAAAGGTTTTCATCTTCA | <i>CD79A</i> exon 4    | 19  | 42384644       | 42384813      |
| AMPL7153111770 | CTCCAGTGTCTCAGCTCACTTC        | GGCAGTTTAGAGGGAAGAAGAGTG       | <i>CD79A</i> exon 5    | 19  | 42385092       | 42385260      |
| AMPL7153723923 | CACTGGACAAAACACTCTGAAGGA      | GGAAAGGACTGTGAAATGTACAAGC      | <i>CARD11</i> exon 8   | 7   | 2977447        | 2977621       |
| AMPL7153723924 | TCTAGTCCCTGGAAAGGAGTGTG       | TCAACAGGATCTACAACCTGCAG        | <i>CARD11</i> exon 7   | 7   | 2978197        | 2978371       |
| AMPL7153854474 | GTTGAAATAGGGTGAGTCACAGTCT     | AGCGCAGGATGAACCTGAA            | <i>CARD11</i> exon 10  | 7   | 2973941        | 2974115       |
| AMPL7154390036 | CAGCTCCGAAGCAGTCACT           | GCCACCTATGAGGACATAGTGAC        | <i>CD79B</i> exon 6    | 17  | 62006524       | 62006663      |
| AMPL7154390082 | CTCTTCCAGTCACCAGTTTGT         | GTATTCTCACAGAGTGATCTGGTCTTTC   | <i>CARD11</i> exon 4   | 7   | 2985481        | 2985624       |
| AMPL7154390136 | TGGGTATGGTGCCCATATCCA         | CACCATGTCCTGAAGTGTGA           | <i>CARD11</i> exon 18  | 7   | 2959016        | 2959143       |
| AMPL7154390246 | ACACCCTGGCAGGTTTCATC          | GAGCAGGTTCTGGAAGTGA            | <i>CARD11</i> exon 6   | 7   | 2979299        | 2979457       |
| AMPL7154390249 | GGCCGATTTTCAATGTCATTCTTCAG    | CCTTTTCTGAGTGTTCCTTGCCA        | <i>CARD11</i> exon 6   | 7   | 2979465        | 2979622       |
| AMPL7154390254 | GCCATGTTCTTCTCCTCACTGA        | CAGGAGCGGTAACAAGATGAAG         | <i>CARD11</i> exon 5   | 7   | 2983877        | 2984001       |
| AMPL7154390256 | CAGGTCCTTGCCCTTCATCTG         | TCTGGAACCTCCTTTTCCACTTC        | <i>CARD11</i> exon 5   | 7   | 2984089        | 2984233       |
| AMPL7154390380 | CCTTCGTGGTTGACCTTGTAGTG       | TGTCTCTGCTCTCCAGCTAGAAG        | <i>CARD11</i> exon 7   | 7   | 2962267        | 2962410       |
| AMPL7154390387 | GGCATTAAAGCACTTCATCTCATCC     | ACTACATGGAGACGCTGAAGGAT        | <i>CARD11</i> exon 3   | 7   | 2987240        | 2987400       |
| AMPL7154390389 | GACCCTGTCTCTCCATAATATAGAGAGG  | GCCGGAAAGTGTAGAAGTCACAC        | <i>CARD11</i> exon 2   | 7   | 2998076        | 2998205       |
| AMPL7154393843 | TGGAAGAATCGTCAGCTTCTTGAC      | CCACTAACGCCAGCTTTTCTCT         | <i>CARD11</i> exon 10  | 7   | 2974170        | 2974294       |
| AMPL7154393848 | CGCACCATCTCGATCCTCATC         | GCCTTCCACTCCCAGATGA            | <i>CARD11</i> exon 9   | 7   | 2976744        | 2976868       |
| AMPL7154630246 | CTGATGTTGCTGCCTCATTTT         | TCCAGCTGGACATCTCCTATGT         | <i>CD79A</i> exon 5    | 19  | 42384904       | 42385037      |

|                |                          |                               |                       |    |          |          |
|----------------|--------------------------|-------------------------------|-----------------------|----|----------|----------|
| AMPL7155670905 | CGATCCATGGAGGCTTGGTG     | GACTTGATCAAGTCCAACATCTACCC    | <i>CARD11</i> exon 24 | 7  | 2949615  | 2949757  |
| AMPL7156929138 | CGCTCACCTGACTTGCAGAT     | GGCAAGAACCTCAGCCTCAT          | <i>CARD11</i> exon 22 | 7  | 2952914  | 2953077  |
| AMPL7157916034 | TTCAAACAACAGAAGTGCCACAT  | GCCACAGGAACATCATTCTCTC        | <i>CD79B</i> exon 6   | 17 | 62006028 | 62006202 |
| AMPL7157916035 | GGGACGGATCACCTCATAGC     | AGAGCTGCCATTTGTCTCCAG         | <i>CD79B</i> exon 6   | 17 | 62006317 | 62006462 |
| AMPL7158623679 | GGGTAATGAGCCCTTAATCGCTG  | TAAGATCCACGACTCCTGCCA         | <i>CD79A</i> exon 5   | 19 | 42385320 | 42385465 |
| AMPL7159608551 | GTCCCAGACACTTCTGTCAG     | ATCTCGTCTCCCGTGAGGA           | <i>CARD11</i> exon 12 | 7  | 2969556  | 2969730  |
| AMPL7161194764 | CCCATGTACCTTCTGCTTCT     | CCCTCTTCTCCTCCAGTTCGT         | <i>CARD11</i> exon 21 | 7  | 2954862  | 2955022  |
| AMPL7163273168 | TCGTCCACCAGATGGTCT       | CTGAGACGGAGGAGGATTCCT         | <i>CARD11</i> exon 25 | 7  | 2946285  | 2946459  |
| AMPL7163274850 | GCTTGACCGAGTGCACGA       | TGACATTCTGTTTCTGCTGCA         | <i>CARD11</i> exon 16 | 7  | 2962819  | 2962990  |
| AMPL7163388233 | CCTTTCAGGGTTGCTTCGAGG    | CCGGGAAACGACTCCATCG           | <i>CARD11</i> exon 13 | 7  | 2968110  | 2968284  |
| AMPL7163388238 | TTGGCAGACCTACCCGGAGT     | CTGAATTCAGCCTCTGAGGCT         | <i>CARD11</i> exon 19 | 7  | 2958112  | 2958261  |
| AMPL7153023028 | CTCCTCTCCCTTTGGAGGACT    | ACGCCACCAAGCTCTTGA            | <i>CARD11</i> exon 21 | 7  | 2954750  | 2954903  |
| AMPL7153023031 | CGCTTATACTTGTTCTCGGACCT  | GGAAATGACTGGCCAGGAAC          | <i>CARD11</i> exon 21 | 7  | 2954975  | 2955147  |
| AMPL7153023037 | CTCCATAGACTCAGGGAAATGGAG | TGAAGTGTGACGATGTTGTGCA        | <i>CARD11</i> exon 18 | 7  | 2958958  | 2959132  |
| AMPL7153023043 | GGTCACTTGCCAGGTCAGAGA    | TTGGACACATGCACCAAAGAGGAAG     | <i>CARD11</i> exon 17 | 7  | 2962197  | 2962355  |
| AMPL7153023129 | GTACCGCTCCTGGAAGGTTAG    | CTTCCTGATGAACGAGGTCATCA       | <i>CARD11</i> exon 5  | 7  | 2983990  | 2984143  |
| AMPL7153055524 | CCGGGAGTTAGTTGAAGC       | CTCCTCTGGTGAAACTGCA           | <i>CARD11</i> exon 19 | 7  | 2958055  | 2958211  |
| AMPL7153109091 | CGAGAAGCTCGGGTTGGAT      | ATGAGGCAGCGAACATCAGCA         | <i>CD79A</i> exon 4   | 19 | 42384751 | 42384922 |
| AMPL7153111265 | ACCTGCTTTATGGGAGAATTGAGC | GACGACAACACTACAACCTTAGCCATG   | <i>CARD11</i> exon 5  | 7  | 2983762  | 2983935  |
| AMPL7153111774 | GAGGGTAACCTCACTCTTCTCCA  | GCAGCGATTAAGGGCTCATTAC        | <i>CD79A</i> exon 5   | 19 | 42385180 | 42385343 |
| AMPL7153118744 | GGGATCCATGGCTGAATGCA     | GCTTCGTGCACTCGGTCAA           | <i>CARD11</i> exon 16 | 7  | 2962674  | 2962839  |
| AMPL7154162014 | CCTCGCCGATCTTGTCCTT      | TCTCCTCCAGAAAGCTGCCT          | <i>CARD11</i> exon 25 | 7  | 2946313  | 2946487  |
| AMPL7154390037 | CTCACCTACAGACCACTTCACTTC | CCACTATCTGCTGGTGTGGTT         | <i>CD79B</i> exon 6   | 17 | 62006604 | 62006745 |
| AMPL7154390081 | CCCTCCTTAGAGTCCAGATGT    | GGTCTTCTTGAGAGCCTAGAATTTTATTA | <i>CARD11</i> exon 4  | 7  | 2985408  | 2985544  |
| AMPL7154390095 | TGCAGCATGACCGTGTTCA      | CGCATATTGATTTCTGTGTGGTT       | <i>CARD11</i> exon 8  | 7  | 2977572  | 2977696  |

|                |                          |                              |                       |    |          |          |
|----------------|--------------------------|------------------------------|-----------------------|----|----------|----------|
| AMPL7154390181 | GGGTTCTTCTCTCGGGAGTAGAT  | TCGAGTTCTGTAGAGCCCAGAA       | <i>CARD11</i> exon 23 | 7  | 2951858  | 2952032  |
| AMPL7154390247 | CCTGGTTTTTGGTCTTCAGCATTT | GGAGGAATGTAAGCTGGAGAGAAATC   | <i>CARD11</i> exon 6  | 7  | 2979403  | 2979527  |
| AMPL7154390381 | GCTACAATTCTGGTTCTGGCTCTA | GGAGCAGGTCAACCTCATGTTC       | <i>CARD11</i> exon 15 | 7  | 2963737  | 2963908  |
| AMPL7154390384 | GACCCTCCCGGATCTGAGA      | ACACACTCACATGCATGCTTTC       | <i>CARD11</i> exon 14 | 7  | 2966345  | 2966471  |
| AMPL7154390386 | ATTTTGGTACAGTACCAAAGGGT  | CTACCTGCGTCAGTGTAAGGTC       | <i>CARD11</i> exon 3  | 7  | 2987124  | 2987297  |
| AMPL7154390388 | GTTACACTCCACATTCTCCACAA  | CAGTGAGACTGCTTTATTAAGCTTGTTG | <i>CARD11</i> exon 3  | 7  | 2987342  | 2987466  |
| AMPL7155246262 | TCCAGGTTGTGCTGTCCTT      | AAAGGACAAGTACAGGAAGCAGATC    | <i>CARD11</i> exon 9  | 7  | 2976675  | 2976815  |
| AMPL7155585458 | AGGGCACCTACCAGGATGT      | CCAGAAGGGCTGAAAGGAGAATG      | <i>CD79A</i> exon 5   | 19 | 42384986 | 42385143 |
| AMPL7155670937 | TTTCGATTAAGCACTGCGAGTACT | CGAGAGCCACAGACGATGTG         | <i>CARD11</i> exon 9  | 7  | 2976814  | 2976987  |
| AMPL7156929142 | CCTCCTCCTGCAGGTTGTAG     | CCTGACCCTCTGAAACCTCCT        | <i>CARD11</i> exon 7  | 7  | 2978342  | 2978499  |
| AMPL7157916033 | CGAGAGAGACAGAGTGACAGATGA | TCTAGGTCCTGTTTGATTTGTGTC     | <i>CARD11</i> exon 11 | 7  | 2972111  | 2972280  |
| AMPL7160408562 | CTTCTCACACCCGGATGA       | CTGCAGGCACCTTCACAGGAG        | <i>CARD11</i> exon 24 | 7  | 2949701  | 2949866  |
| AMPL7160516146 | ACGAGCCTGTGTGTGGTTT      | CTCCCAGCAGAGCTTGGGAA         | <i>CD79B</i> exon 6   | 17 | 62006087 | 62006252 |
| AMPL7163388221 | CTGGATGCCCTCAGGTTCA      | CAGTAACCATCATCTCAGGACTTTG    | <i>CARD11</i> exon 10 | 7  | 2974087  | 2974244  |
| AMPL7163388234 | CGTCCTCCTGTAGCGTCT       | CCCTGCGTGTGTAATATTATGCAC     | <i>CARD11</i> exon 13 | 7  | 2968245  | 2968386  |
| AMPL7163890965 | CTTCTACTCCAGGCCCTTGG     | CCTCAGTGA CTGCTTCGGAG        | <i>CD79B</i> exon 6   | 17 | 62006401 | 62006546 |

**Supplementary Table 4. Relationship between mutations and clinical response**

| Usage / dose | Best response | COO | <i>CARD11</i> | <i>CD79A</i> | <i>CD79B</i> | <i>MYD88</i> |
|--------------|---------------|-----|---------------|--------------|--------------|--------------|
| 320 mg       | CR            | NGC | R235Q/S622del | E145Q        | E229K        | WT           |
| 320 mg       | CR            | GCB | WT            | WT           | K187Q/Y196S  | L265P        |
| 320 mg       | CRu           | GCB | S622del/H737Y | WT           | Y196H        | L265P        |
| 320 mg       | CRu           | GCB | WT            | WT           | Y196S        | L265P        |
| 320 mg       | CRu           | GCB | S622del       | WT           | WT           | L265P        |
| 320 mg       | PR            | NGC | S622del       | WT           | WT           | WT           |
| 320 mg       | PR            | NGC | WT            | WT           | Y196C        | WT           |
| 320 mg       | PR            | NGC | WT            | WT           | WT           | L265P        |
| 320 mg       | PR            | NGC | WT            | WT           | WT           | L265P        |
| 320 mg       | PR            | GCB | D200N/A209T   | WT           | WT           | WT           |
| 320 mg       | PR            | GCB | WT            | WT           | WT           | L265P        |
| 320 mg       | PR            | GCB | S622del       | WT           | WT           | L265P        |
| 320 mg       | SD            | NGC | WT            | WT           | Y196N        | L265P        |
| 320 mg       | SD            | NGC | WT            | WT           | Y196S        | L265P        |
| 320 mg       | SD            | NGC | WT            | WT           | K187R/Y196C  | L265P        |
| 320 mg       | SD            | NGC | G540E/A581T   | WT           | E192K/Y196C  | L265P        |
| 320 mg       | PD            | NGC | WT            | WT           | WT           | L265P        |
| 320 mg       | PD            | NGC | WT            | WT           | Y196H        | L265P        |
| 320 mg       | PD            | NGC | W814end       | WT           | WT           | L265P        |
| 320 mg       | PD            | NGC | F115I         | WT           | WT           | WT           |
| 480 mg       | CR            | NGC | S622del       | WT           | WT           | L265P        |
| 480 mg       | CRu           | NGC | WT            | WT           | WT           | L265P        |
| 480 mg       | CRu           | NGC | G123S/S622del | WT           | WT           | L265P        |
| 480 mg       | CRu           | GCB | WT            | WT           | WT           | L265P        |
| 480 mg       | PR            | NGC | WT            | WT           | WT           | L265P        |
| 480 mg       | PR            | NGC | WT            | WT           | WT           | L265P        |
| 480 mg       | PR            | NGC | F130L         | WT           | WT           | WT           |

|                |     |     |                     |             |             |             |
|----------------|-----|-----|---------------------|-------------|-------------|-------------|
| 480 mg, fasted | CR  | NGC | S622del             | WT          | WT          | WT          |
| 480 mg, fasted | CRu | NGC | S622del             | WT          | Y196S       | L265P       |
| 480 mg, fasted | CRu | NGC | C49Y/Q288*          | WT          | E229K       | Q262*       |
| 480 mg, fasted | CRu | GCB | E185A/S622del       | WT          | Y196H       | L265P       |
| 480 mg, fasted | CRu | GCB | E185A/S622del       | WT          | WT          | L265P       |
| 480 mg, fasted | CRu | GCB | E185A               | WT          | Y196D       | WT          |
| 480 mg, fasted | PR  | NGC | S622del             | WT          | WT          | L265P       |
| 480 mg, fasted | PR  | NGC | N255D/Q395*         | WT          | WT          | WT          |
| 480 mg, fasted | PR  | NGC | E185A/A581T/S622del | WT          | WT          | WT          |
| 480 mg, fasted | SD  | NGC | M275I/G504D/S622del | WT          | WT          | WT          |
| 480 mg, fasted | SD  | NGC | S622del             | WT          | WT          | L265P       |
| 480 mg, fasted | SD  | NGC | E185A/S622del       | WT          | Y196S       | L265P       |
| 480 mg, fasted | PD  | NGC | E185A               | WT          | Y196H       | L265P       |
| 480 mg, fasted | PD  | NGC | E185A/S622del       | WT          | A188G/E224D | L265P       |
| 480 mg, fasted | PD  | NGC | S622del             | WT          | WT          | L265P       |
| 480 mg, fasted | PD  | GCB | Q48*/Q288*          | G167S/L168F | Y196C/D202N | L265P/K269E |
| 480 mg, fasted | PD  | GCB | D224N/D230N/M365I   | WT          | WT          | WT          |

COO, cell-of-origin (as determined by immunohistochemistry); WT, wild-type; DEL, deletion; GCB, germinal centre subtype; NGC, non-germinal centre subtype; CRu, unconfirmed complete response ; PR, partial response; SD, stable disease; PD, progressive disease



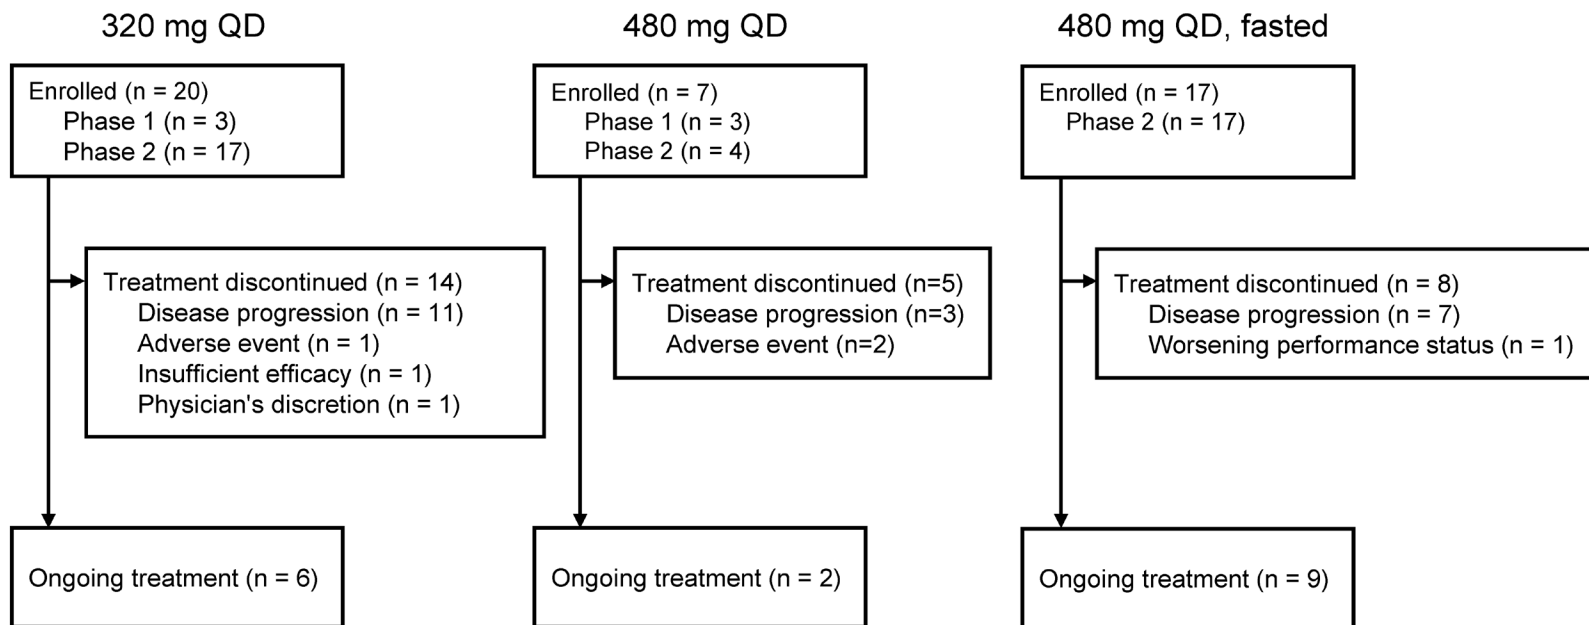

**Supplementary Fig. 1. Patient disposition**

QD, once daily
